# Supplementary material for: Insight into the role of Ni–Fe dual sites in the oxygen evolution reaction based on atomically metal-doped polymeric carbon nitride
Source: Royal Society of Chemistry journal article supplement (doi:10.1039/c9ta03163d), 2019-01-01
Supplement: c9ta03163d1.pdf [file c9ta03163d1.pdf]

# Supporting Information

## Insight into the Role of Ni-Fe Dual Sites towards Oxygen Evolution Reaction

### Based on Atomically Metal-Doped Polymeric Carbon Nitride

Chuchu Wu,<sup>ab</sup> Xiaoming Zhang,<sup>a</sup> Zhangxun Xia,<sup>a</sup> Miao Shu,<sup>bc</sup> Huanqiao Li,<sup>a</sup> Xinlong Xu,<sup>ab</sup> Rui Si,<sup>c</sup> Alexandre I. Rykov,<sup>d</sup>

Junhu Wang,<sup>d</sup> Shansheng Yu,<sup>e</sup> Suli Wang,<sup>\*a</sup> and Gongquan Sun<sup>\*a</sup>

<sup>a</sup> Dalian National Laboratory for Clean Energy, Dalian Institute of Chemical Physics, Chinese Academy of Sciences, Dalian 116023, China

<sup>b</sup> University of Chinese Academy of Sciences, Beijing, 100049, China

<sup>c</sup> Shanghai Synchrotron Radiation Facility, Shanghai Institute of Applied Physics, Chinese Academy of Sciences, Shanghai, 201204, China

<sup>d</sup> Mössbauer Effect Data Center, Dalian Institute of Chemical Physics, Chinese Academy of Sciences, Dalian 116023, China

<sup>e</sup> Department of Materials Science, Jilin University, Changchun 130012, China

## I. Supplemental Figures

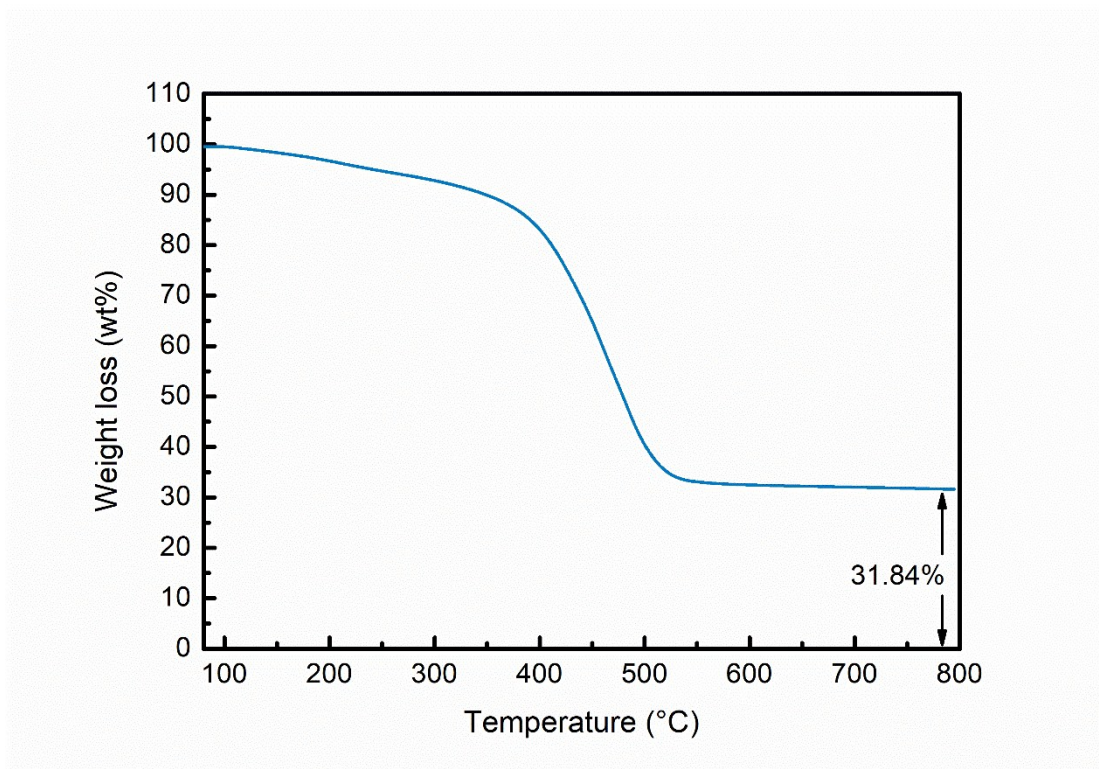

**Figure S1.** Thermogravimetric analysis of  $\text{Ni}_{0.65}\text{Fe}_{0.35}\text{@PCN}$ .

Thermogravimetric analysis was carried out under air atmosphere to 800°C, and the amount of inorganic residue is 31.84 wt%. At 800°C, nickel species has been oxidized to NiO. Taking the loading content on the pristine sample into consideration (Ni: 15.36 wt%; Fe: 8.82 wt%), the amount of inorganic residue is about 31.74 wt% assuming the product of iron species is  $\text{Fe}_3\text{O}_4$ , and about 32.16 wt% assuming the product is  $\text{Fe}_2\text{O}_3$ . The calculated value is close to the experimental result of TGA, further confirming the atomic metal components.

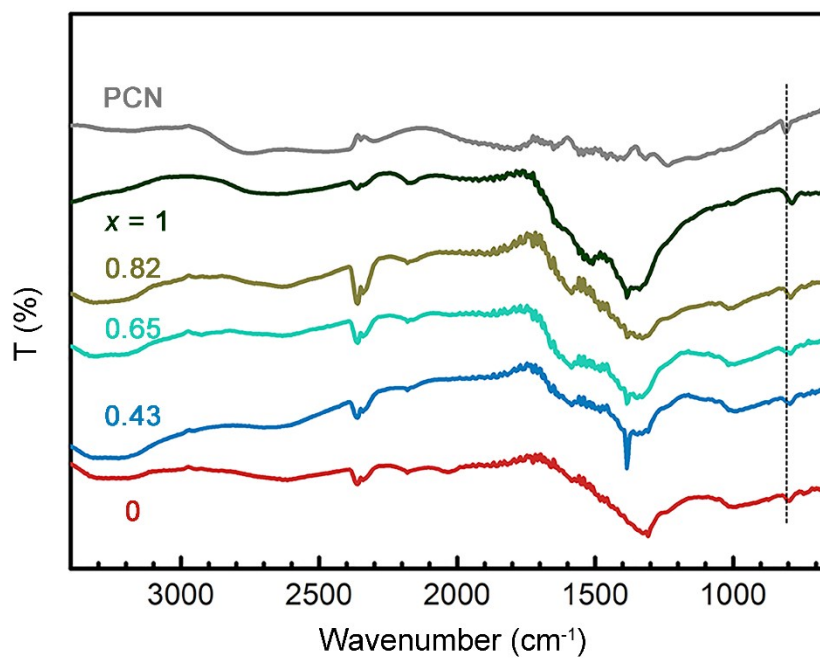

**Figure S2.** FT-IR transmittance spectra of PCN and Ni<sub>x</sub>Fe<sub>1-x</sub>@PCN.

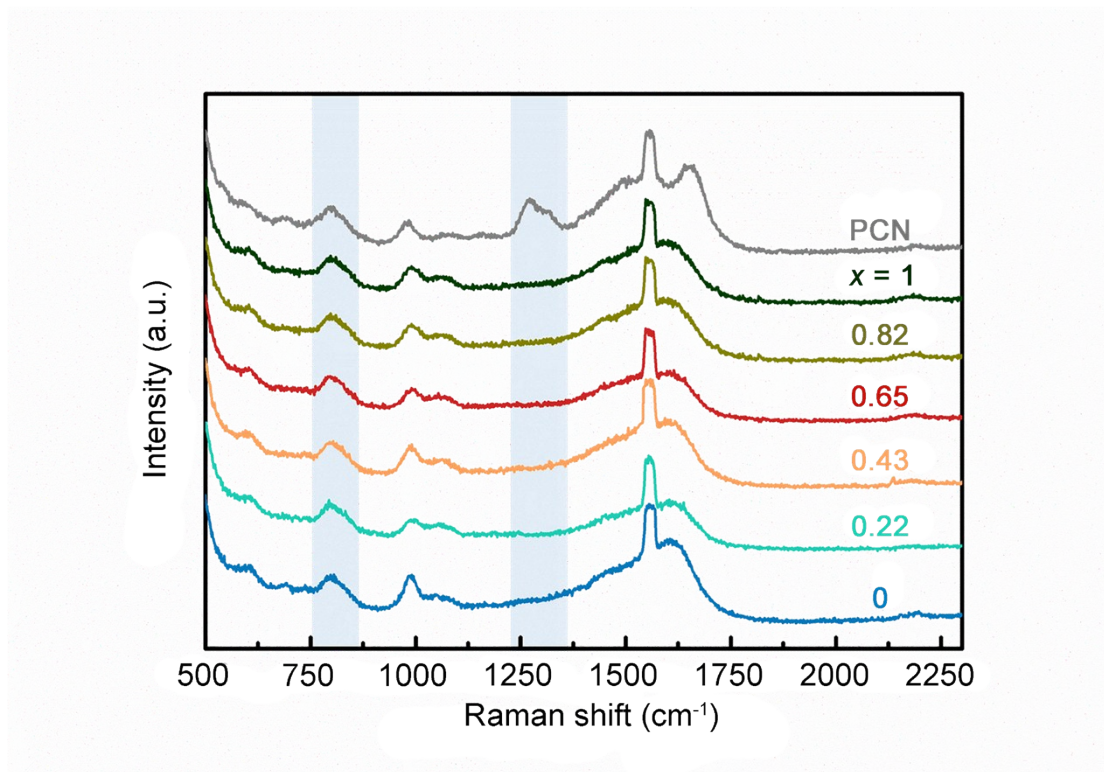

**Figure S3.** Raman spectra of PCN and  $\text{Ni}_x\text{Fe}_{1-x}@\text{PCN}$ .

We were unable to make a tentative assignment of the peak at  $1268\text{ cm}^{-1}$  in PCN, which disappears after introducing metal. However, according to the range it appears, it might be attributed to the vibration mode of nitrogenous component of PCN, intensity of which decreased dramatically after metal doping because metal is coordinated with N atoms. The strong peak around  $1557\text{ cm}^{-1}$  is attributed to oxygen in air.

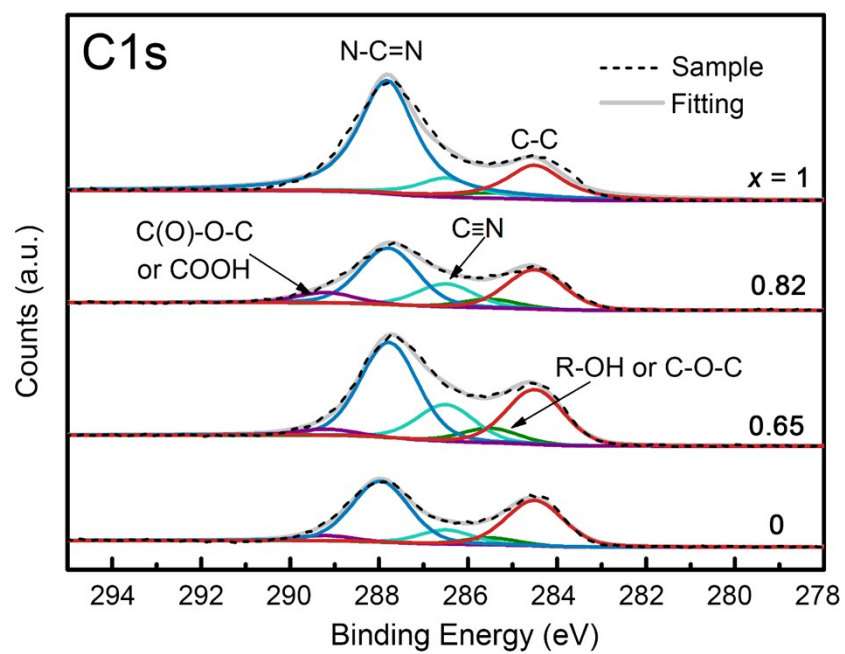

**Figure S4.** C 1s high-resolution XPS surveys of  $\text{Ni}_x\text{Fe}_{1-x}@PCN$ .

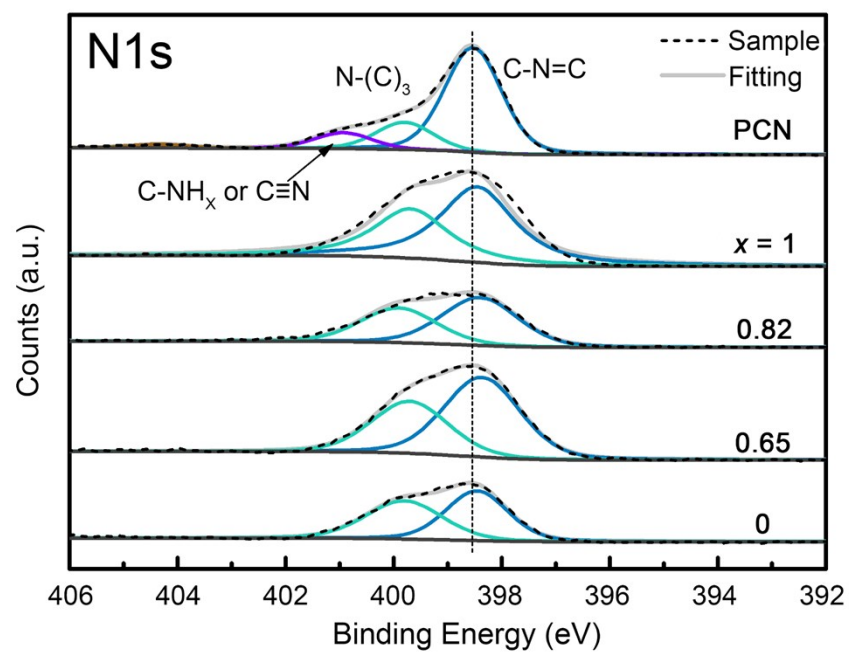

**Figure S5.** N 1s high-resolution XPS surveys of PCN and  $Ni_xFe_{1-x}@PCN$ .

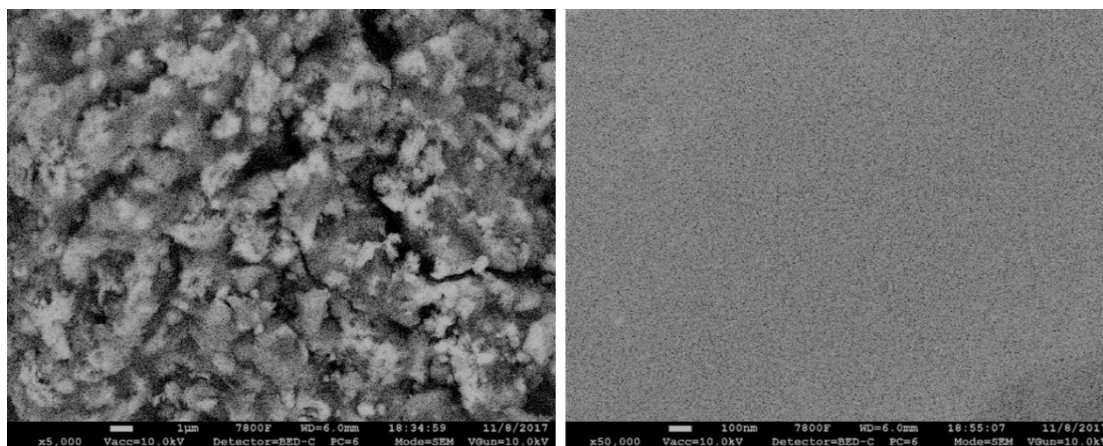

**Figure S6.** SEM image of Ni<sub>0.65</sub>Fe<sub>0.35</sub>@PCN under the back scattered electron mode

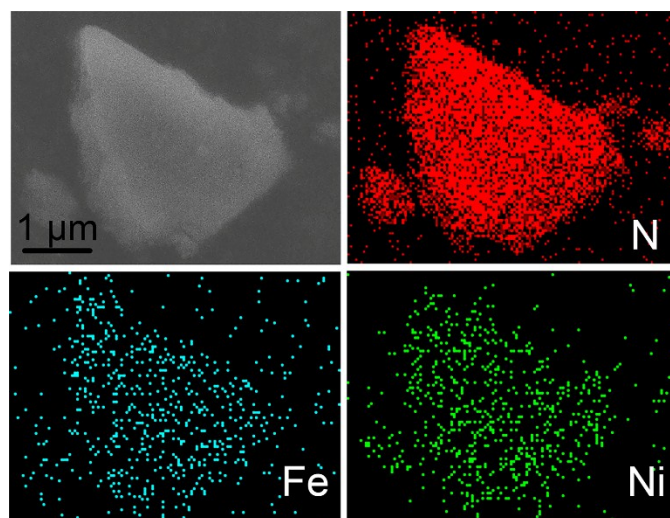

**Figure S7.** SEM image of  $\text{Ni}_{0.65}\text{Fe}_{0.35}\text{@PCN}$  as well as corresponding EDS mapping images of N, Fe and Ni.



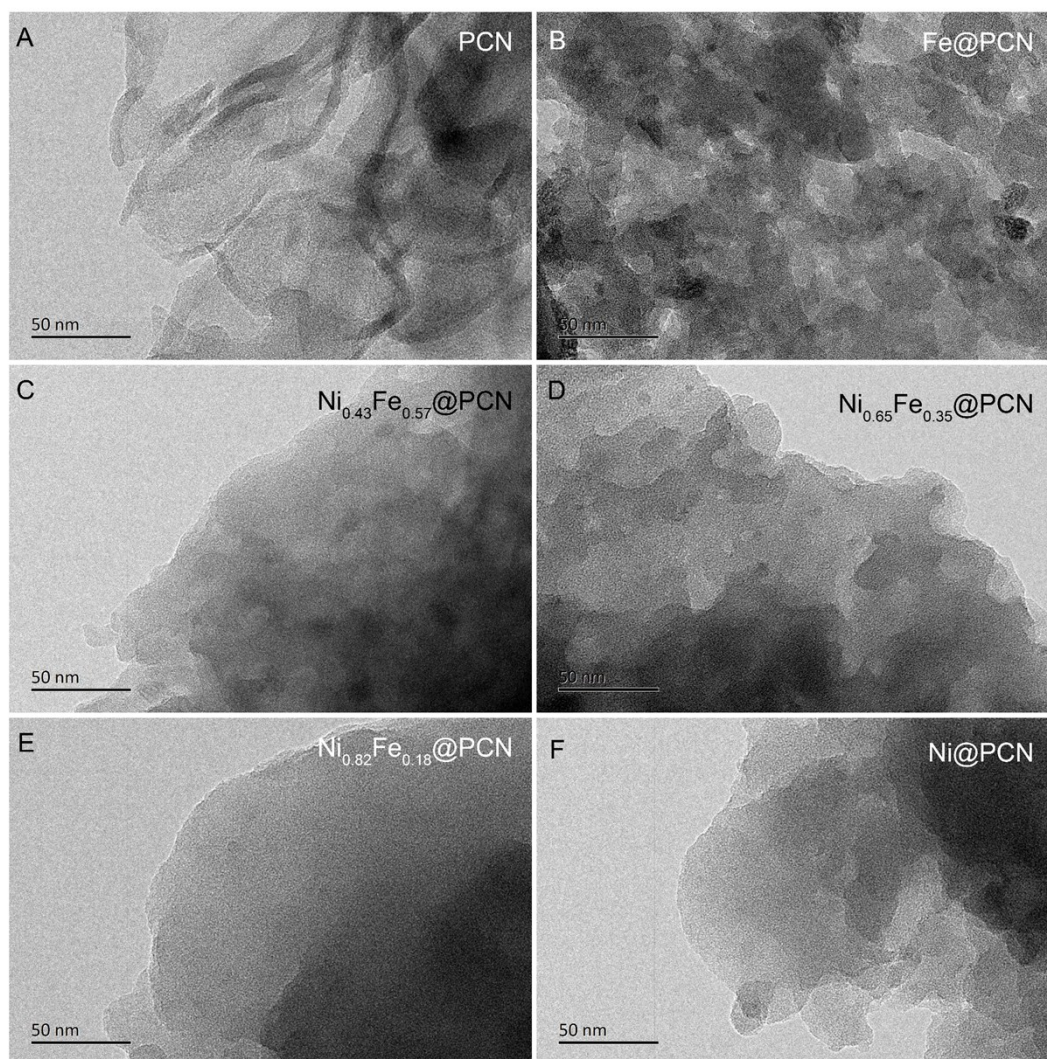

**Figure S8.** TEM images of PCN (A), Fe@PCN (B),  $\text{Ni}_{0.43}\text{Fe}_{0.57}\text{@PCN}$  (C),  $\text{Ni}_{0.65}\text{Fe}_{0.35}\text{@PCN}$  (D),  $\text{Ni}_{0.82}\text{Fe}_{0.18}\text{@PCN}$  (E), and Ni@PCN (F).

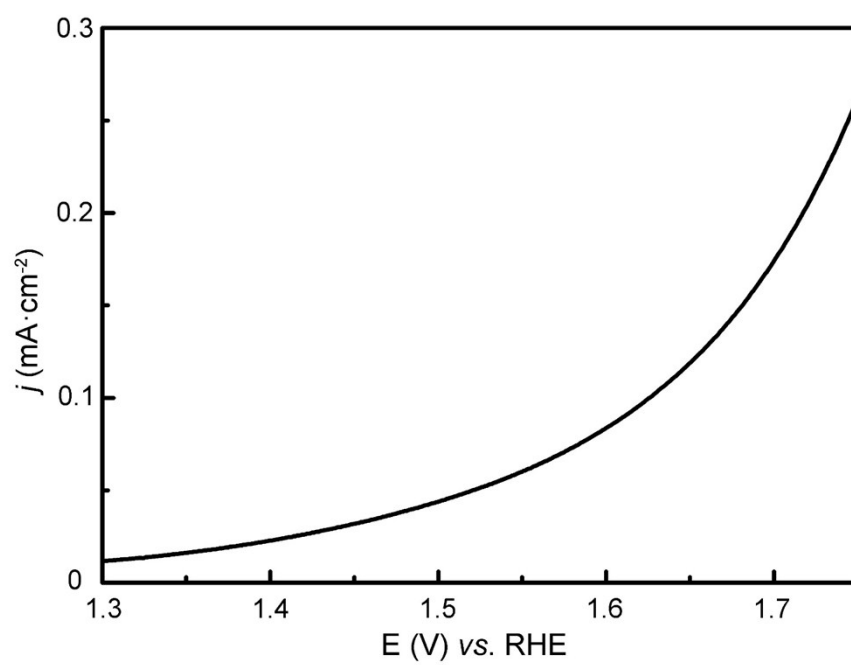

**Figure S9.** OER polarization curves of mixture of PCN and Vulcan XC-72 in  $\text{O}_2$ -saturated 1 M KOH. Scan rate: 10 mV/s, electrode rotation rate: 1600 rpm.

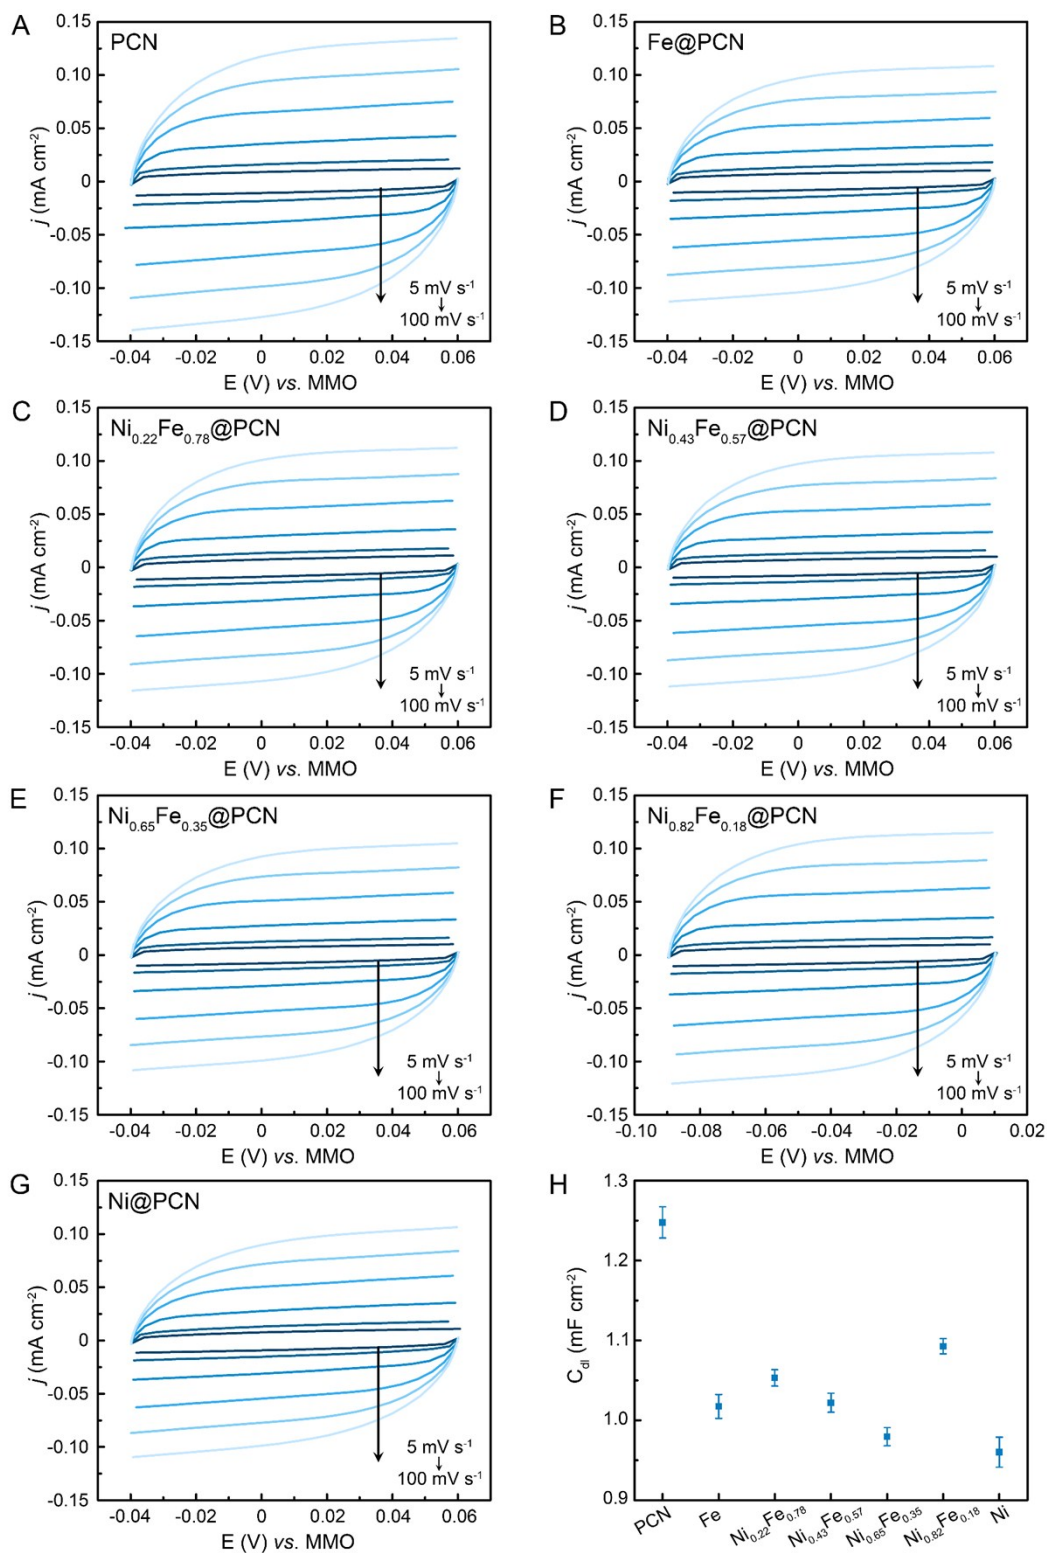

**Figure S10.** The electric double layer capacitance ( $C_{dl}$ ) measurements of PCN and Ni<sub>x</sub>Fe<sub>1-x</sub>@PCN.

The electrochemically active surface area (ECSA) is calculated on the basis of measured double-layer capacitance using LSVs in a non-Faradaic potential range, typically a 0.1 V window around OCP. LSV measurements were conducted in a quiescent solution of 1M KOH by sweeping the potential anodically or cathodically at 6 different scan rates: 0.005, 0.01, 0.025, 0.05, 0.075 and 0.1 V·s<sup>-1</sup>. The working electrode was held at each potential vertex for 10 s before beginning the next sweep. The electrical double layer capacitance ( $C_{dl}$ ) was obtained by calculating the slope from the linear relationship of the current density against the scan rate, and the results were shown on Figure S10H. The larger  $C_{dl}$  value of PCN is due to the two-dimensional morphology (See Figure S8A), which is partly destroyed when metal ions are introduced.

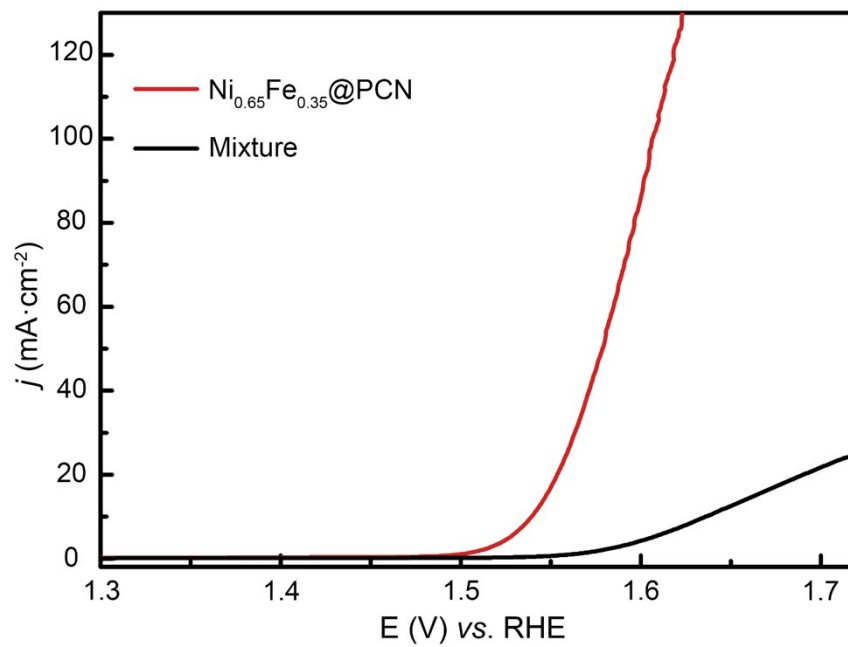

**Figure S11.** OER polarization curves of mixture of Ni@PCN and Fe@PCN (mass ratio 1:1) as well as  $\text{Ni}_{0.65}\text{Fe}_{0.35}@PCN$  in  $\text{O}_2$ -saturated 1 M KOH. Scan rate: 10 mV/s, electrode rotation rate: 1600 rpm.



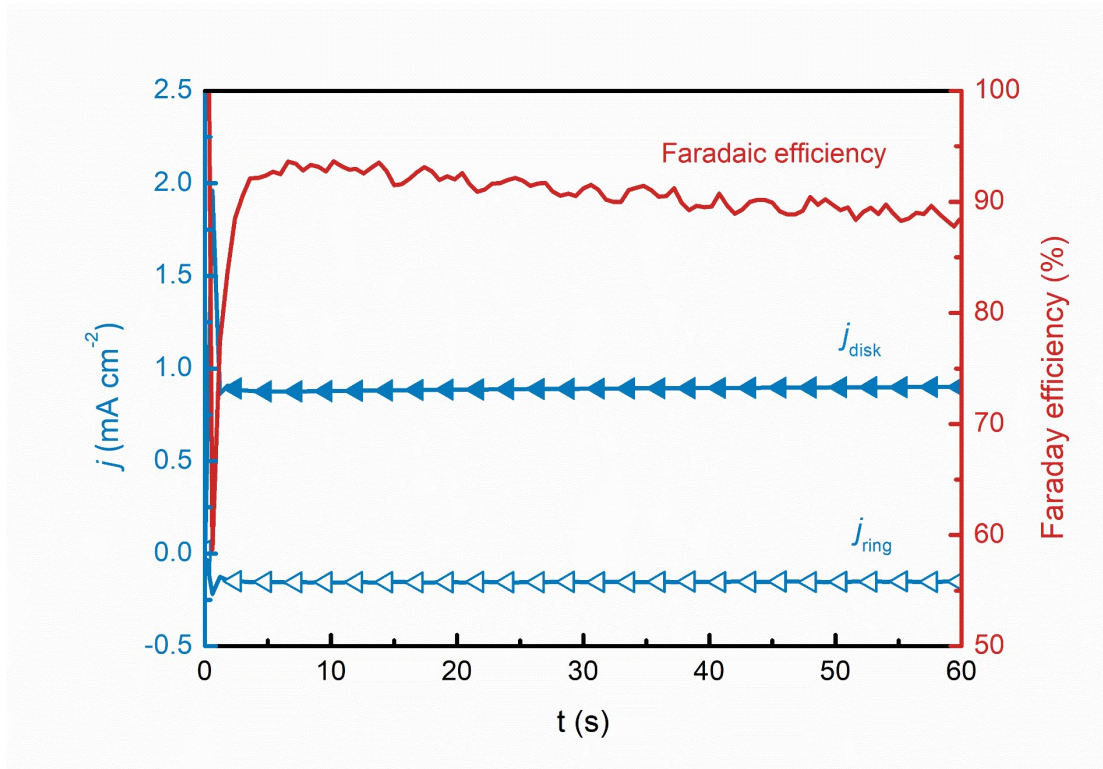

**Figure S12.** Faradaic efficiency testing of  $\text{Ni}_{0.65}\text{Fe}_{0.35}\text{@PCN}$  using the RRDE technique in  $\text{N}_2$ -saturated 1 M KOH solution.

When a constant potential (1.493 V vs. RHE) is applied to the glassy-carbon disk electrode ( $0.255 \text{ cm}^2$ ) for oxygen generation, a ring current caused by oxygen reduction is detected immediately. The Pt ring electrode was held at a constant potential  $E = 0.3 \text{ V}$  vs RHE to rapidly reduce  $\text{O}_2$  to  $\text{H}_2\text{O}_2$ . The disk current density is below  $1 \text{ mA}\cdot\text{cm}^{-2}$  which is sufficiently large to ensure appreciable  $\text{O}_2$  production but sufficiently small to minimize local saturation and bubble formation at the disk electrode. The electrode rotation rate is kept 1200 rpm so that the apparent number of electron transfer,  $n_{app} = ca. 2$ . The Faradaic efficiency of the OER system,  $\varepsilon$ , is proportional to the ratio of the ring current to the disk current and is given by the equation below:

$$\varepsilon = \frac{2i_r}{i_d N}$$

where  $i_r$  is the measured ring current,  $i_d$  is the measured disc current, and  $N = 0.38$  is the collection efficiency for the RRDE.

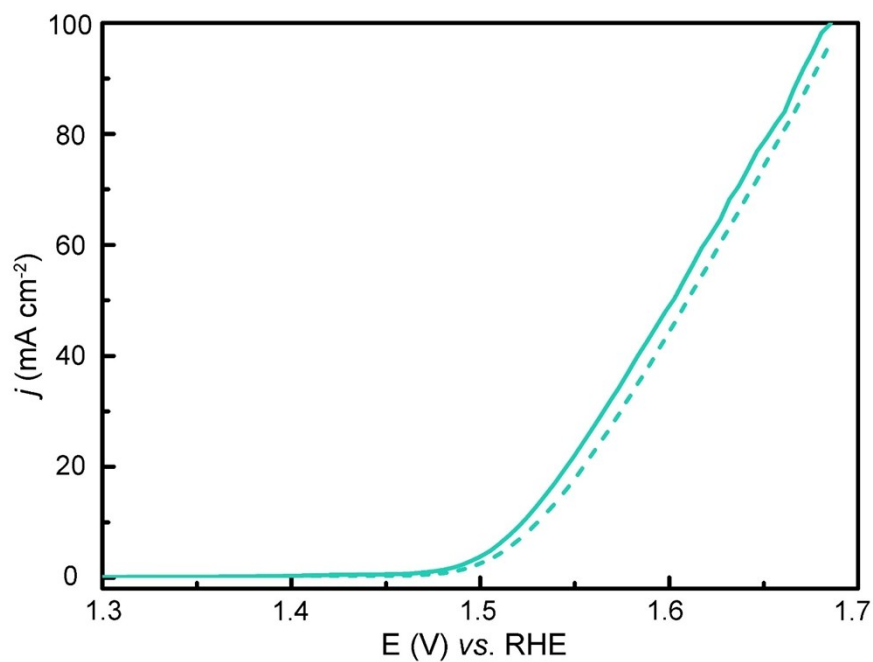

**Figure S13.** OER polarization curves of  $\text{Ni}_{0.65}\text{Fe}_{0.35}\text{@PCN}$  before (solid curve) and after (dash curve) stability test in  $\text{O}_2$ -saturated 1 M KOH without IR-correction. Scan rate: 10 mV/s, electrode rotation rate: 1600 rpm. Stability test: chronoamperometry at 1.53 V (vs. RHE) for 2 h in  $\text{O}_2$ -saturated 1 M KOH.



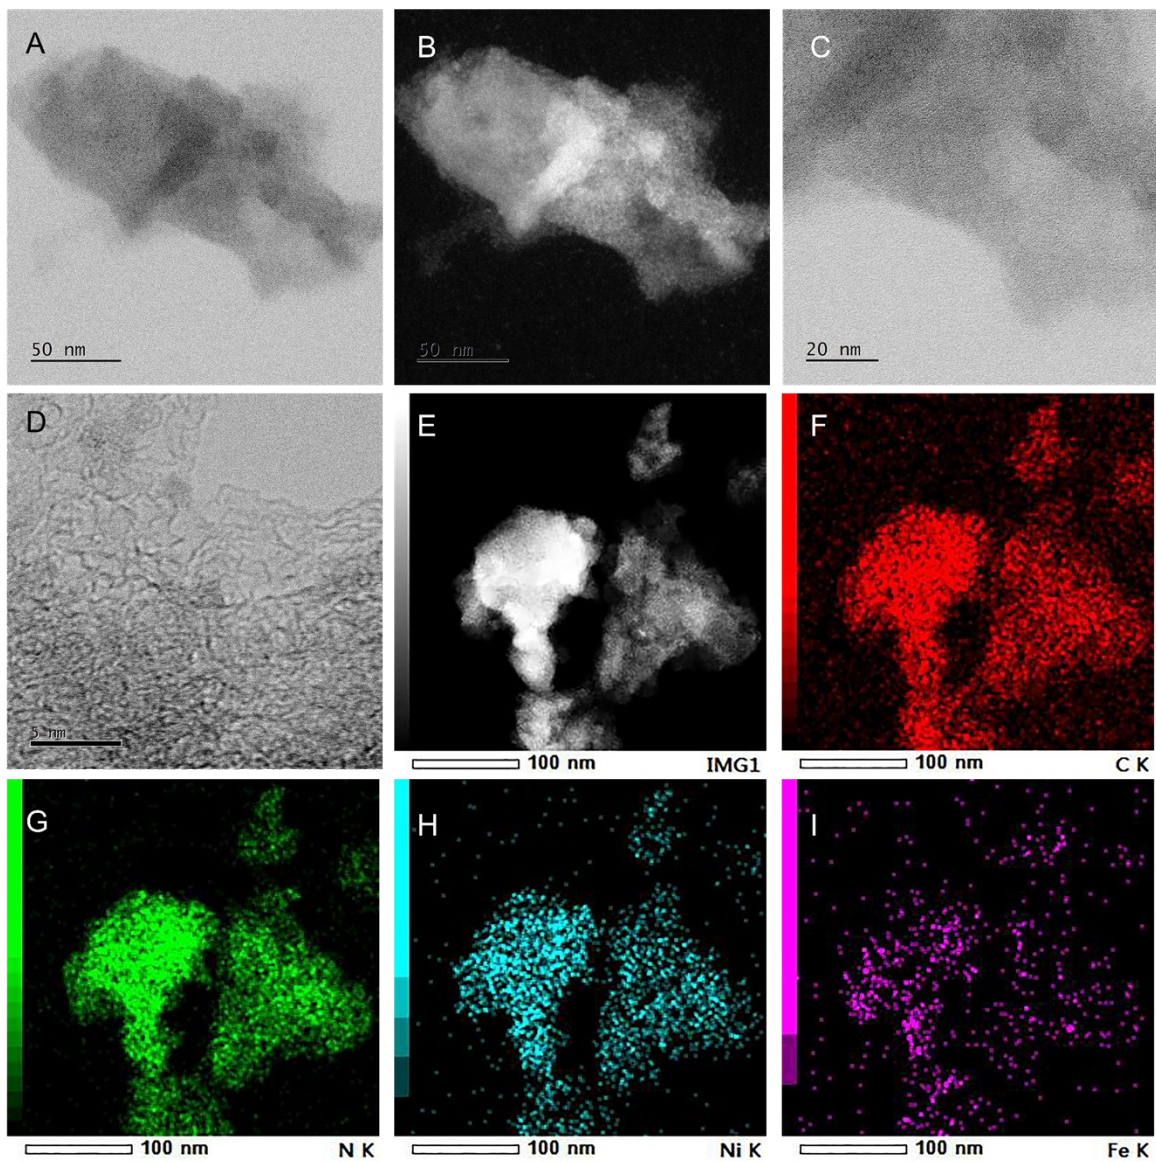

**Figure S14.** TEM images of  $\text{Ni}_{0.65}\text{Fe}_{0.35}@\text{PCN}$  after OER test as well as corresponding EDS mapping images of C, N, Ni and Fe.

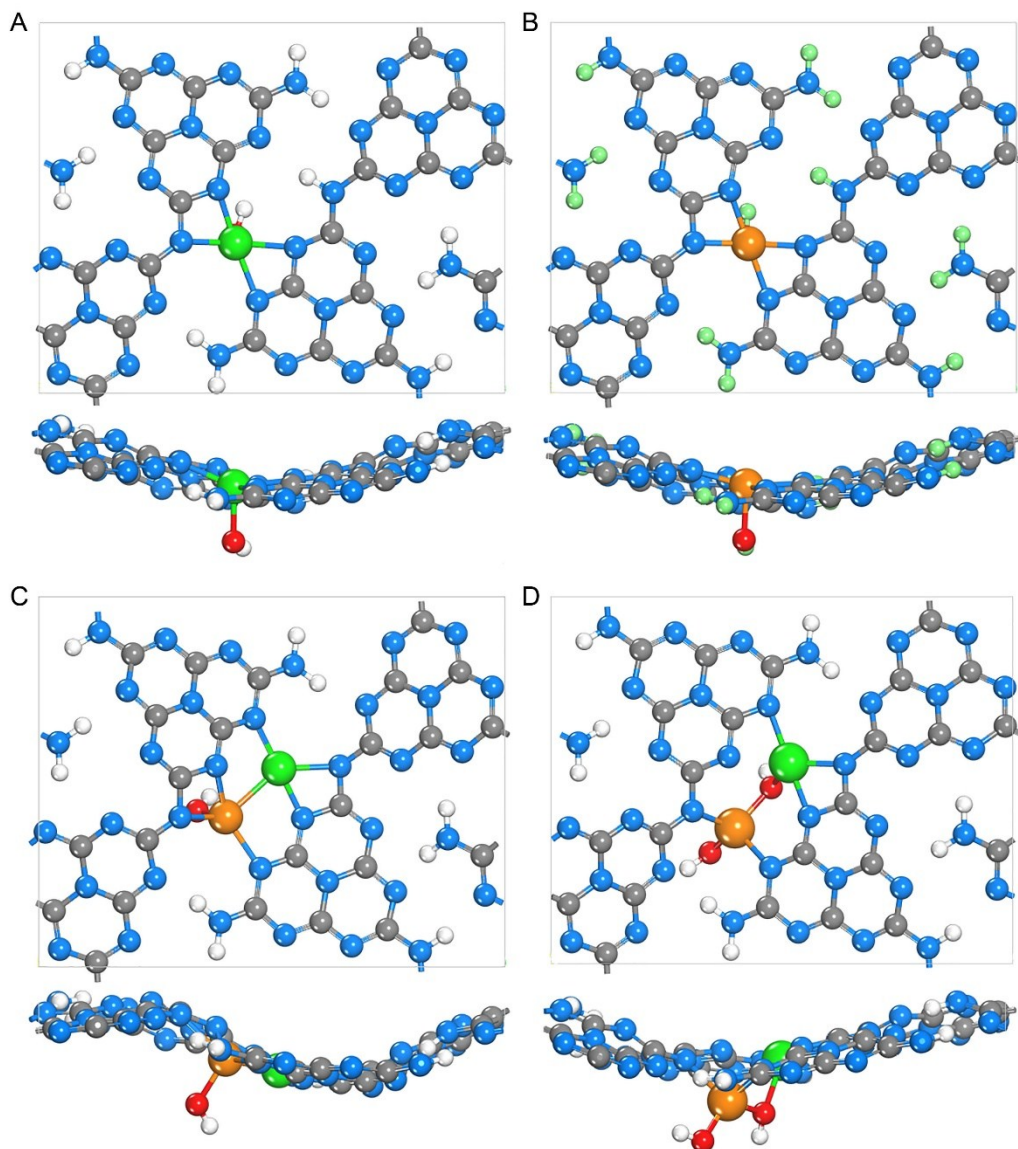

**Figure S15.** Top and side views of four different configurations of NiOH@PCN (A), FeOH@PCN (B), NiFeOH@PCN (C), and NiFe(OH)<sub>2</sub>@PCN (D) after geometry optimization. The green, yellow, red, blue, gray and white balls are Ni, Fe, O, N, C and H atoms, respectively.

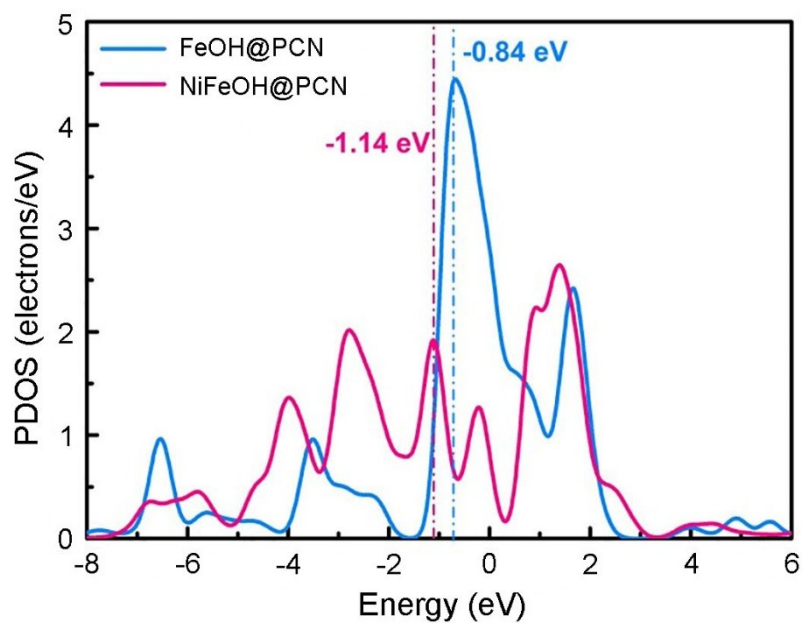

**Figure S16.** The density of states and d band center of Fe atoms in FeOH@PCN and NiFeOH@PCN.

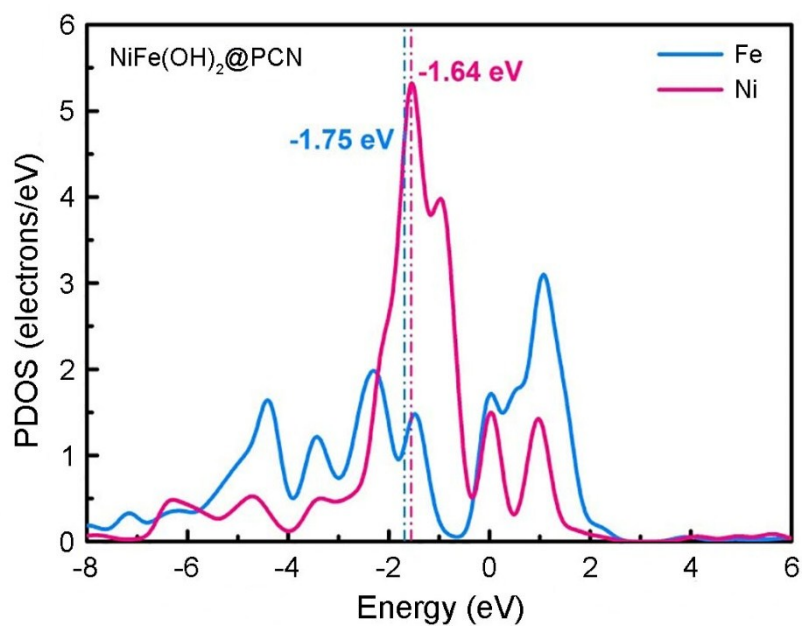

**Figure S17.** The density of states and d band center of Fe and Ni atoms in NiFe(OH)<sub>2</sub>@PCN.

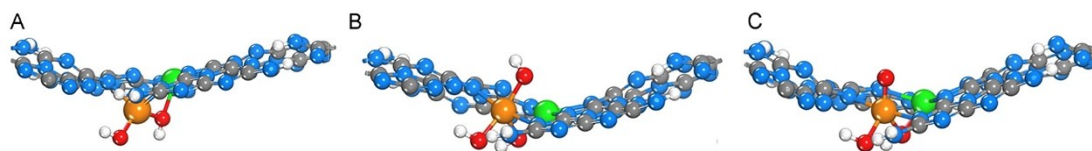

**Figure S18.** The bare  $\text{NiFe(OH)}_2@PCN$  substrate (A) and with adsorbed  $\text{OH}^*$  (B) and  $\text{O}^*$  (C) after geometry optimization. The green, yellow, red, blue, gray and white balls are Ni, Fe, O, N, C and H atoms, respectively.

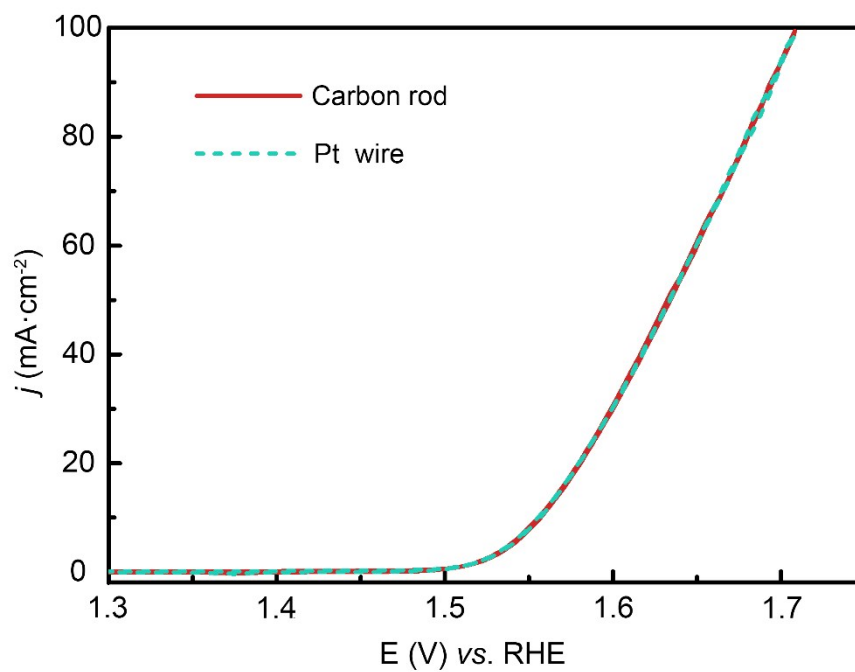

**Figure S19.** OER polarization curves of  $\text{Ni}_{0.65}\text{Fe}_{0.35}\text{@PCN}$  with carbon rod and Pt wire as counter electrode, respectively. Experiments was conducted in  $\text{O}_2$ -saturated 1 M KOH without IR-correction. Scan rate: 10 mV/s, electrode rotation rate: 1600 rpm.

## II. Supplemental Tables

**Table S1.** The molar ratio of Ni/(Ni+Fe) in  $\text{Ni}_x\text{Fe}_{1-x}@\text{PCN}$ .

| Ni/(Ni+Fe)<br>(Molar ratio) | $\text{Ni}_{0.22}\text{Fe}_{0.78}@\text{PCN}$ | $\text{Ni}_{0.43}\text{Fe}_{0.57}@\text{PCN}$ | $\text{Ni}_{0.65}\text{Fe}_{0.35}@\text{PCN}$ | $\text{Ni}_{0.82}\text{Fe}_{0.18}@\text{PCN}$ |
|-----------------------------|-----------------------------------------------|-----------------------------------------------|-----------------------------------------------|-----------------------------------------------|
| reactants                   | 0.20                                          | 0.35                                          | 0.50                                          | 0.80                                          |
| ICP-OES                     | 0.22                                          | 0.43                                          | 0.65                                          | 0.82                                          |

**Table S2.** XPS analysis of Ni<sub>x</sub>Fe<sub>1-x</sub>@PCN and PCN

| Element            | Type of bonding                                                  | Catalyst | Binding energy |
|--------------------|------------------------------------------------------------------|----------|----------------|
| Carbon<br>(C 1s)   | C-C                                                              | For all  | 284.5 eV       |
|                    | R-OH or C-O-C                                                    | For all  | 285.5 eV       |
|                    | C≡N; sp-hybridized carbon                                        | For all  | 286.5 eV       |
|                    | N-C=N; sp <sup>2</sup> -hybridized carbon                        | x = 0    | 287.9 eV       |
|                    |                                                                  | x = 0.65 | 287.7 eV       |
|                    |                                                                  | x = 0.82 | 287.7 eV       |
|                    |                                                                  | x = 1    | 287.8 eV       |
|                    | C(O)-O-C or COOH                                                 | For all  | 289.2 eV       |
| Nitrogen<br>(N 1s) | C-N=C; sp <sup>2</sup> -hybridized nitrogen                      | PCN      | 398.5 eV       |
|                    |                                                                  | x = 0    | 398.4 eV       |
|                    |                                                                  | x = 0.65 | 398.3 eV       |
|                    |                                                                  | x = 0.82 | 398.4 eV       |
|                    |                                                                  | x = 1    | 398.4 eV       |
|                    |                                                                  | PCN      | 399.8 eV       |
|                    | N-(C) <sub>3</sub> ; sp <sup>3</sup> -hybridized nitrogen        | x = 0    | 399.8 eV       |
|                    |                                                                  | x = 0.65 | 399.7 eV       |
|                    |                                                                  | x = 0.82 | 399.9 eV       |
|                    |                                                                  | x = 1    | 399.7 eV       |
|                    | C-NH <sub>x</sub> or C≡N; primary/secondary amine or cyano group | For all  | 401.0 eV       |



**Table S3.** EXAFS data fitting results of Fe@PCN and Ni<sub>0.65</sub>Fe<sub>0.35</sub>@PCN for Fe K-edge

| Sample                                     | Fe-N CN <sup>a</sup> | R <sup>b</sup> / Å | ( $\sigma^2$ ) <sup>c</sup> *10 <sup>2</sup> / Å <sup>2</sup> | $\Delta E_0^d$ / eV |
|--------------------------------------------|----------------------|--------------------|---------------------------------------------------------------|---------------------|
| Fe@PCN                                     | 2.5 ± 0.2            | 2.039 ± 0.007      | 0.737 ± 0.060                                                 | 5.7                 |
| Ni <sub>0.65</sub> Fe <sub>0.35</sub> @PCN | 2.7 ± 0.5            | 2.016 ± 0.018      | 0.863 ± 0.207                                                 | 10.0                |

<sup>a</sup> CN: coordination number.<sup>b</sup> R: interatomic distance.<sup>c</sup>  $\sigma^2$ : Debye-Waller factor.<sup>d</sup> E<sub>0</sub>: energy shift.

**Table S4.** EXAFS data fitting results of Ni@PCN and Ni<sub>0.65</sub>Fe<sub>0.35</sub>@PCN for Ni-K edge including coordination number (CN), interatomic distance (R), Debye-Waller factor ( $\sigma^2$ ), and energy shift ( $E_0$ ).

| Sample                                     | Ni-N CN <sup>a</sup> | R <sup>b</sup> / Å | ( $\sigma^2$ ) <sup>c</sup> *10 <sup>2</sup> / Å <sup>2</sup> | $\Delta E_0$ <sup>d</sup> / eV |
|--------------------------------------------|----------------------|--------------------|---------------------------------------------------------------|--------------------------------|
| Ni@PCN                                     | 2.1 ± 0.3            | 1.86 ± 0.02        | 0.41 ± 0.26                                                   | 6.2                            |
| Ni <sub>0.65</sub> Fe <sub>0.35</sub> @PCN | 2.9 ± 0.2            | 1.87 ± 0.01        | 0.56 ± 0.13                                                   | 6.4                            |

<sup>a</sup> CN: coordination number.

<sup>b</sup> R: interatomic distance.

<sup>c</sup>  $\sigma^2$ : Debye-Waller factor.

<sup>d</sup>  $E_0$ : energy shift.

**Table S5.**  $E_0^a$  Values of the NiFe@PCN as well as reference samples.

| Sample            | Fe foil | Fe Pc  | Fe@PCN | Ni <sub>0.65</sub> Fe <sub>0.35</sub> @PCN |
|-------------------|---------|--------|--------|--------------------------------------------|
| $E_0$ for Fe (eV) | 7112    | 7122.5 | 7120.2 | 7122.4                                     |
| Sample            | Ni foil | Ni Pc  | Ni@PCN | Ni <sub>0.65</sub> Fe <sub>0.35</sub> @PCN |
| $E_0$ for Ni (eV) | 8333    | 8339.1 | 8338.7 | 8338.7                                     |

<sup>a</sup> $E_0$ : the first inflection point.

**Table S6.** The zero point energies and entropic corrections of oxygenates at 298 K

| Species          | ZPE <sup>1</sup> | TS <sup>1</sup> | ZPE <sup>2</sup> | TS <sup>2</sup> | ZPE <sup>a</sup> | TS <sup>a</sup> |
|------------------|------------------|-----------------|------------------|-----------------|------------------|-----------------|
| O*               | 0.05             | 0.00            | 0.084            | 0.05            | 0.13             | 0.04            |
| OH*              | 0.36             | 0.06            | 0.386            | 0.07            | 0.39             | 0.09            |
| OOH*             | 0.40             | 0.08            | 0.457            | 0.16            | 0.49             | 0.13            |
| O <sub>2</sub>   | 0.11             | 0.64            | -                | -               | -                | -               |
| H <sub>2</sub>   | 0.27             | 0.41            | 0.27             | 0.41            | 0.27             | 0.41            |
| H <sub>2</sub> O | 0.56             | 0.67            | 0.56             | 0.67            | 0.56             | 0.67            |

<sup>a</sup> The present work.

**Table S7.** The free energy of adsorbed oxygenates at 298 K

|                           | NiOH@PCN | FeOH@PCN | NiFeOH@PCN | NiFe(OH) <sub>2</sub> @PCN |
|---------------------------|----------|----------|------------|----------------------------|
| $\Delta G_{\text{OH}^*}$  | 0.94     | -0.26    | 0.36       | 1.34                       |
| $\Delta G_{\text{O}^*}$   | 2.95     | 0.99     | 1.16       | 2.32                       |
| $\Delta G_{\text{OOH}^*}$ | 3.78     | 2.63     | 3.24       | 4.00                       |

**Table S8.** The reaction free energy  $\Delta G$  of NiOH@PCN, FeOH@PCN, NiFeOH@PCN, and NiFe(OH)<sub>2</sub>@PCN

| NiOH@PCN                                                                      | U = 0 | U = 1.23 | U = 1.58 |
|-------------------------------------------------------------------------------|-------|----------|----------|
| $\Delta G_1 = \Delta G_{\text{OH}^*} - eU$                                    | 0.94  | -0.29    | -0.64    |
| $\Delta G_2 = \Delta G_{\text{O}^*} - \Delta G_{\text{OH}^*} - eU$            | 2.01  | 0.78     | 0.43     |
| $\Delta G_3 = \Delta G_{\text{OOH}^*} - \Delta G_{\text{O}^*} - eU$           | 0.83  | -0.40    | -0.75    |
| $\Delta G_4 = 4.92 - \Delta G_{\text{OOH}^*} - eU$                            | 1.14  | -0.09    | -0.44    |
| FeOH@PCN                                                                      | U = 0 | U = 1.23 | U = 1.58 |
| $\Delta G_1 = \Delta G_{\text{OH}^*} - eU$                                    | -0.26 | -1.49    | -1.84    |
| $\Delta G_2 = \Delta G_{\text{O}^*} - \Delta G_{\text{OH}^*} - eU$            | 1.25  | 0.02     | -0.33    |
| $\Delta G_3 = \Delta G_{\text{OOH}^*} - \Delta G_{\text{O}^*} - eU$           | 1.64  | 0.41     | 0.06     |
| $\Delta G_4 = 4.92 - \Delta G_{\text{OOH}^*} - eU$                            | 2.30  | 1.07     | 0.72     |
| NiFeOH@PCN                                                                    | U = 0 | U = 1.23 | U = 1.58 |
| $\Delta G_1 = \Delta G_{\text{OH}^*} - eU$                                    | 0.36  | -0.87    | -1.22    |
| $\Delta G_2 = \Delta G_{\text{O}^*} - \Delta G_{\text{OH}^*} - eU$            | 0.81  | -0.42    | -0.77    |
| $\Delta G_3 = \Delta G_{\text{OOH}^*} - \Delta G_{\text{O}^*} - eU$           | 2.08  | 0.85     | 0.50     |
| $\Delta G_4 = 4.92 - \Delta G_{\text{OOH}^*} - eU$                            | 1.68  | 0.45     | 0.10     |
| NiFe(OH) <sub>2</sub> @PCN Path I                                             | U = 0 | U = 1.23 | U = 1.58 |
| $\Delta G_1 = \Delta G_{\text{OH}^*} - eU$                                    | 1.34  | 0.11     | -0.24    |
| $\Delta G_2 = \Delta G_{\text{O}^*} - \Delta G_{\text{OH}^*} - eU$            | 0.98  | -0.25    | -0.60    |
| $\Delta G_3 = \Delta G_{\text{OOH}^*} - \Delta G_{\text{O}^*} - eU$           | 1.68  | 0.45     | 0.10     |
| $\Delta G_4 = 4.92 - \Delta G_{\text{OOH}^*} - eU$                            | 0.92  | -0.31    | -0.66    |
| NiFe(OH) <sub>2</sub> @PCN Path II                                            | U = 0 | U = 1.23 | U = 1.58 |
| $\Delta G_1 = \Delta G_{\text{OH}^*} - eU$                                    | 1.34  | 0.11     | -0.24    |
| $\Delta G_2 = \Delta G_{\text{O}^*} - \Delta G_{\text{OH}^*} - eU$            | 0.98  | -0.25    | -0.60    |
| $\Delta G_3 = \Delta G_{\text{O}^*+\text{OH}^*} - \Delta G_{\text{O}^*} - eU$ | 0.80  | -0.43    | -0.78    |
| $\Delta G_4 = 4.92 - \Delta G_{\text{O}^*+\text{OH}^*} - eU$                  | 1.80  | 0.57     | 0.22     |

### III. Supplemental Details of Calculation Method

The adsorption free energy of intermediate species are determined using<sup>3</sup>  $\Delta G_{ads} = \Delta E_{ads}^{DFT} + \Delta ZPE - T\Delta S$ , where  $\Delta E_{ads}^{DFT}$  can be calculated relative to H<sub>2</sub>O and H<sub>2</sub>. The absorption energies were calculated as follows,  $\Delta E_{OH^*} = E(OH^*) - E(*) - (E_{H_2O} - 1/2E_{H_2})$ ,  $\Delta E_{OOH^*} = E(OOH^*) - E(*) - (2E_{H_2O} - 3/2E_{H_2})$ ,  $\Delta E_{O^*} = E(O^*) - E(*) - (E_{H_2O} - E_{H_2})$ ,  $E_{H_2O}$  and  $E_{H_2}$  are the calculated DFT energies of H<sub>2</sub>O and H<sub>2</sub> molecules in the gas phase using the approaches outlined by Nørskov et al.<sup>3, 4</sup>  $\Delta ZPE$  and  $T\Delta S$  are the zero point energy difference and the entropy change between the absorbed state and the free state, i.e., the gas phase (listed in Table S6), respectively, and  $T\Delta S$  is the temperature (298.15 K in this work). Because the high-spin ground state of an oxygen molecule is difficult to describe in DFT calculations, the free energy of O<sub>2</sub>(g) is derived as  $G_{O_2}(g) = 2G_{H_2O}(l) - 2G_{H_2}(g) + 4.92eV$ .

For each step, the reaction free energy  $\Delta G$  is defined as the difference between free energies of the initial and final states and is given by the expression,<sup>5</sup>

$$\Delta G = \Delta E + \Delta ZPE - T\Delta S + \Delta G_U$$

Here  $\Delta E$  is the reaction energies obtained from DFT total energies of the catalyst surface with possible configurations of adsorbed reactants or intermediates. If a reaction step involves the electron and proton transfer, the relevant bias effects are taking into account by shifting the energy by  $\Delta G_U = -eU$ , where U is the electrode potential and e is a transferred charge.

## REFERENCES

- 1 S. Zhou, N. Liu, Z. Wang and J. Zhao, *ACS Appl. Mater. Interfaces*, 2017, **9**, 22578-22587.
- 2 M. Li, L. Zhang, Q. Xu, J. Niu and Z. Xia, *J. Catal.*, 2014, **314**, 66-72.
- 3 J. K. Nørskov, J. Rossmeisl, A. Logadottir, L. Lindqvist, J. R. Kitchin, T. Bligaard and H. Jónsson, *J. Phys. Chem. B*, 2004, **108**, 17886-17892.
- 4 I. C. Man, H.-Y. Su, F. Calle-Vallejo, H. A. Hansen, J. I. Martínez, N. G. Inoglu, J. Kitchin, T. F. Jaramillo, J. K. Nørskov and J. Rossmeisl, *ChemCatChem*, 2011, **3**, 1159-1165.
- 5 N. Yang, L. Li, J. Li, W. Ding and Z. Wei, *Chem. Sci.*, 2018, **9**, 5795-5804.
